# Supplementary material
Source: HighWire-hosted journal article supplement (https://jech.bmj.com/content/jech-2019-213282)
Supplement: inline-supplementary-material-1 [file inline-supplementary-material-1.pdf]

**Supplemental table 1. Odds ratios (95% confidence intervals) for adult outcomes of illicit drug use in the past year in adolescence in the imputed sample with no missing outcome data (n = 9,651)**

| <b>Outcome at 30 years</b>                                                                          | <b>Used illicit drugs by 16-years of age</b> |
|-----------------------------------------------------------------------------------------------------|----------------------------------------------|
| <b>Health behavior</b>                                                                              |                                              |
| Illicit drug use in the past year                                                                   | 1.89 (1.52, 2.35)                            |
| Smoke every day                                                                                     | 1.24 (0.97, 1.58)                            |
| Alcohol problem (CAGE score $\geq 2$ )                                                              | 1.28 (0.97, 1.69)                            |
| <b>Mental health</b>                                                                                |                                              |
| Seen specialist for problem with illicit drugs since 16 years of age                                | 2.13 (0.96, 4.71)                            |
| Seen specialist for psychiatric problem since 16 years of age                                       | 1.27 (1.08, 1.48)                            |
| Psychiatric morbidity (Malaise score $\geq 7$ )                                                     | 1.33 (1.07, 1.66)                            |
| <b>Physical health</b>                                                                              |                                              |
| Seen doctor since 16 years of age to get treatment for an accident                                  | 1.12 (0.98, 1.28)                            |
| Seen doctor since 16 years of age to get treatment for a violent assault, mugging or sexual assault | 1.32 (1.07, 1.64)                            |
| <b>Socioeconomic disadvantage</b>                                                                   |                                              |
| Unemployed                                                                                          | 1.28 (0.79, 2.08)                            |
| Homeless since 16 years of age                                                                      | 1.81 (1.23, 2.67)                            |
| <b>Police/ criminal justice experiences</b>                                                         |                                              |
| Arrested by police since 16 years                                                                   | 1.59 (1.28, 1.98)                            |
| Formally cautioned by police since 16 years                                                         | 1.96 (1.49, 2.59)                            |
| Been found guilty in court since 16 years                                                           | 1.71 (1.34, 2.19)                            |

<sup>a</sup> Reference category was never used illicit drugs. Odds ratios (ORs) are adjusted for sex, parental social class and the Rutter Malaise Inventory and at 16 years. When available, age 16-year (baseline) assessments of outcomes were added to multivariable models. This included adjusting for screening positive on the Rutter Malaise Inventory at 16 years for the outcome at 30-years of having seen a specialist for a psychiatric problem; units of alcohol consumed in the past week at 16 years for the outcome at 30-years of screening positive for alcohol dependency; and the number of cigarettes smoked per week at 16 years for the outcome at 30-years of smoking every day.

**Supplemental table 2. Odds ratios (95% confidence intervals) for adult outcomes of illicit drug use in adolescence (n = 9, 651)**

| Outcome at 30 years <sup>a</sup>                                                                    | Illicit drug use at 16 years |                            |                    | P-value for trend |
|-----------------------------------------------------------------------------------------------------|------------------------------|----------------------------|--------------------|-------------------|
|                                                                                                     | Never                        | Taken but not in past year | Taken in past year |                   |
| <b>Health behavior</b>                                                                              |                              |                            |                    |                   |
| Illicit drug use in the past year                                                                   | 1 (Reference)                | 1.62 (1.26, 2.07)          | 2.47 (1.83, 3.32)  | <0.001            |
| Smoke every day                                                                                     | 1                            | 1.13 (0.85, 1.49)          | 1.47 (1.07, 2.00)  | 0.04              |
| Alcohol problem (CAGE score ≥2)                                                                     | 1                            | 1.13 (0.83, 1.52)          | 1.58 (1.09, 2.28)  | 0.03              |
| <b>Mental health</b>                                                                                |                              |                            |                    |                   |
| Seen specialist for problem with illicit drugs since 16                                             | 1                            | 1.55 (0.59, 4.04)          | 3.08 (1.17, 8.09)  | 0.03              |
| Seen specialist for psychiatric problem since 16                                                    | 1                            | 1.24 (1.04, 1.47)          | 1.32 (0.98, 1.77)  | 0.03              |
| Psychiatric morbidity (Malaise score ≥7)                                                            | 1                            | 1.35 (1.07, 1.68)          | 1.30 (0.92, 1.83)  | 0.03              |
| <b>Physical health</b>                                                                              |                              |                            |                    |                   |
| Seen doctor since 16 years of age to get treatment for an accident                                  | 1                            | 1.11 (0.94, 1.31)          | 1.15 (0.93, 1.42)  | 0.10              |
| Seen doctor since 16 years of age to get treatment for a violent assault, mugging or sexual assault | 1                            | 1.32 (1.01, 1.73)          | 1.33 (0.92, 1.93)  | 0.02              |
| <b>Socioeconomic disadvantage</b>                                                                   |                              |                            |                    |                   |
| Unemployed                                                                                          | 1                            | 1.23 (0.71, 2.16)          | 1.36 (0.74, 2.51)  | 0.28              |
| Homeless since 16 years of age                                                                      | 1                            | 1.56 (1.06, 2.31)          | 2.48 (1.67, 3.70)  | <0.001            |
| <b>Police/ criminal justice experiences</b>                                                         |                              |                            |                    |                   |
| Arrested by police since 16 years                                                                   | 1                            | 1.54 (1.20, 1.97)          | 1.70 (1.25, 2.31)  | <0.001            |
| Formally cautioned by police since 16 years                                                         | 1                            | 1.71 (1.29, 2.27)          | 2.47 (1.64, 3.73)  | <0.001            |
| Been found guilty in court since 16 years                                                           | 1                            | 1.49 (1.13, 1.96)          | 2.16 (1.58, 2.95)  | <0.001            |

<sup>a</sup> Odds ratios (ORs) are adjusted for sex, parental social class and the Rutter Malaise Inventory and at 16 years. When available, age 16-year (baseline) assessments of outcomes were added to multivariable models. This included adjusting for screening positive on the Rutter Malaise Inventory at 16 years for the outcome at 30-years of having seen a specialist for a psychiatric problem; units of alcohol consumed in the past week at 16 years for the outcome at 30-years of screening positive for alcohol dependency; and the number of cigarettes smoked per week at 16 years for the outcome at 30-years of smoking every day.

**Supplemental table 3. Odds ratios (95% confidence intervals) for adult outcomes of illicit drug use in the past year in adolescence in participants with no missing data (n = 1,858)**

| <b>Outcome at 30 years<sup>a</sup></b>                                                              | <b>Used illicit drugs by 16-years of age</b> |
|-----------------------------------------------------------------------------------------------------|----------------------------------------------|
| <b>Health behavior</b>                                                                              |                                              |
| Illicit drug use in the past year                                                                   | 3.12 (2.21, 4.40)                            |
| Smoke every day                                                                                     | 1.24 (0.82, 1.86)                            |
| Alcohol problem (CAGE score $\geq 2$ )                                                              | 1.64 (1.07, 2.51)                            |
| <b>Mental health</b>                                                                                |                                              |
| Seen specialist for problem with illicit drugs since 16 years of age                                | - <sup>b</sup>                               |
| Seen specialist for psychiatric problem since 16 years of age                                       | 1.59 (1.23, 2.04)                            |
| Psychiatric morbidity (Malaise score $\geq 7$ )                                                     | 2.85 (1.96, 4.16)                            |
| <b>Physical health</b>                                                                              |                                              |
| Seen doctor since 16 years of age to get treatment for an accident                                  | 1.34 (0.96, 1.89)                            |
| Seen doctor since 16 years of age to get treatment for a violent assault, mugging or sexual assault | 1.84 (1.07, 3.16)                            |
| <b>Socioeconomic disadvantage</b>                                                                   |                                              |
| Unemployed                                                                                          | - <sup>b</sup>                               |
| Homeless since 16 years of age                                                                      | 2.78 (1.48, 5.25)                            |
| <b>Police/ criminal justice experiences</b>                                                         |                                              |
| Arrested by police since 16 years                                                                   | 2.52 (1.78, 3.57)                            |
| Formally cautioned by police since 16 years                                                         | 2.10 (1.33, 3.30)                            |
| Been found guilty in court since 16 years                                                           | 2.12 (1.32, 3.41)                            |

<sup>a</sup> Reference category was never used illicit drugs; <sup>b</sup> No cases so not able to estimate. Odds ratios (ORs) are adjusted for sex, parental social class and the Rutter Malaise Inventory and at 16 years. When available, age 16-year (baseline) assessments of outcomes were added to multivariable models. This included adjusting for screening positive on the Rutter Malaise Inventory at 16 years for the outcome at 30-years of having seen a specialist for a psychiatric problem; units of alcohol consumed in the past week at 16 years for the outcome at 30-years of screening positive for alcohol dependency; and the number of cigarettes smoked per week at 16 years for the outcome at 30-years of smoking every day.

**Supplemental table 4. Odds ratios (95% confidence intervals) for adult outcomes of illicit drug use in adolescence (n = 1, 858)**

| Outcome at 30 years <sup>a</sup>                                                                    | Illicit drug use at 16 years |                            |                    | P-value for trend |
|-----------------------------------------------------------------------------------------------------|------------------------------|----------------------------|--------------------|-------------------|
|                                                                                                     | Never                        | Taken but not in past year | Taken in past year |                   |
| <b>Health behavior</b>                                                                              |                              |                            |                    |                   |
| Illicit drug use in the past year                                                                   | 1 (Reference)                | 2.65 (1.77, 3.97)          | 4.64 (2.55, 8.46)  | <0.001            |
| Smoke every day                                                                                     | 1                            | 1.06 (0.65, 1.73)          | 1.73 (0.87, 3.43)  | 0.16              |
| Alcohol problem (CAGE score ≥2)                                                                     | 1                            | 1.39 (0.84, 2.30)          | 2.43 (1.21, 4.87)  | 0.008             |
| <b>Mental health</b>                                                                                |                              |                            |                    |                   |
| Seen specialist for problem with illicit drugs since 16                                             | - <sup>b</sup>               | -                          | -                  | -                 |
| Seen specialist for psychiatric problem since 16                                                    | 1                            | 1.32 (0.85, 2.05)          | 1.12 (0.56, 2.25)  | 0.33              |
| Psychiatric morbidity (Malaise score ≥7)                                                            | 1                            | 1.79 (1.08, 2.97)          | 1.49 (0.68, 3.28)  | 0.04              |
| <b>Physical health</b>                                                                              |                              |                            |                    |                   |
| Seen doctor since 16 years of age to get treatment for an accident                                  | 1                            | 1.28 (0.86, 1.89)          | 1.53 (0.82, 2.87)  | 0.07              |
| Seen doctor since 16 years of age to get treatment for a violent assault, mugging or sexual assault | 1                            | 1.84 (0.99, 3.42)          | 1.85 (0.70, 4.85)  | 0.04              |
| <b>Socioeconomic disadvantage</b>                                                                   |                              |                            |                    |                   |
| Unemployed                                                                                          | - <sup>b</sup>               | -                          | -                  | -                 |
| Homeless since 16 years of age                                                                      | 1                            | 1.76 (0.74, 4.20)          | 5.56 (2.36, 13.08) | <0.001            |
| <b>Police/ criminal justice experiences</b>                                                         |                              |                            |                    |                   |
| Arrested by police since 16 years                                                                   | 1                            | 2.18 (1.45, 3.27)          | 3.67 (1.96, 6.87)  | <0.001            |
| Formally cautioned by police since 16 years                                                         | 1                            | 1.54 (0.88, 2.71)          | 4.00 (1.95, 8.20)  | <0.001            |
| Been found guilty in court since 16 years                                                           | 1                            | 1.62 (0.90, 2.92)          | 3.68 (1.75, 7.75)  | <0.001            |

<sup>a</sup> Odds ratios (ORs) are adjusted for sex, parental social class and the Rutter Malaise Inventory and at 16 years. When available, age 16-year (baseline) assessments of outcomes were added to multivariable models. <sup>b</sup> No cases so not able to estimate. This included adjusting for screening positive on the Rutter Malaise Inventory at 16 years for the outcome at 30-years of having seen a specialist for a psychiatric problem; units of alcohol consumed in the past week at 16 years for the outcome at 30-years of screening positive for alcohol dependency; and the number of cigarettes smoked per week at 16 years for the outcome at 30-years of smoking every day.
